# Supplementary material
Source: publisher figshare collection journal article supplement (https://gsajournals.figshare.com/articles/dataset/_/7646975)
Supplement: Supplementary file 1 [file 1]

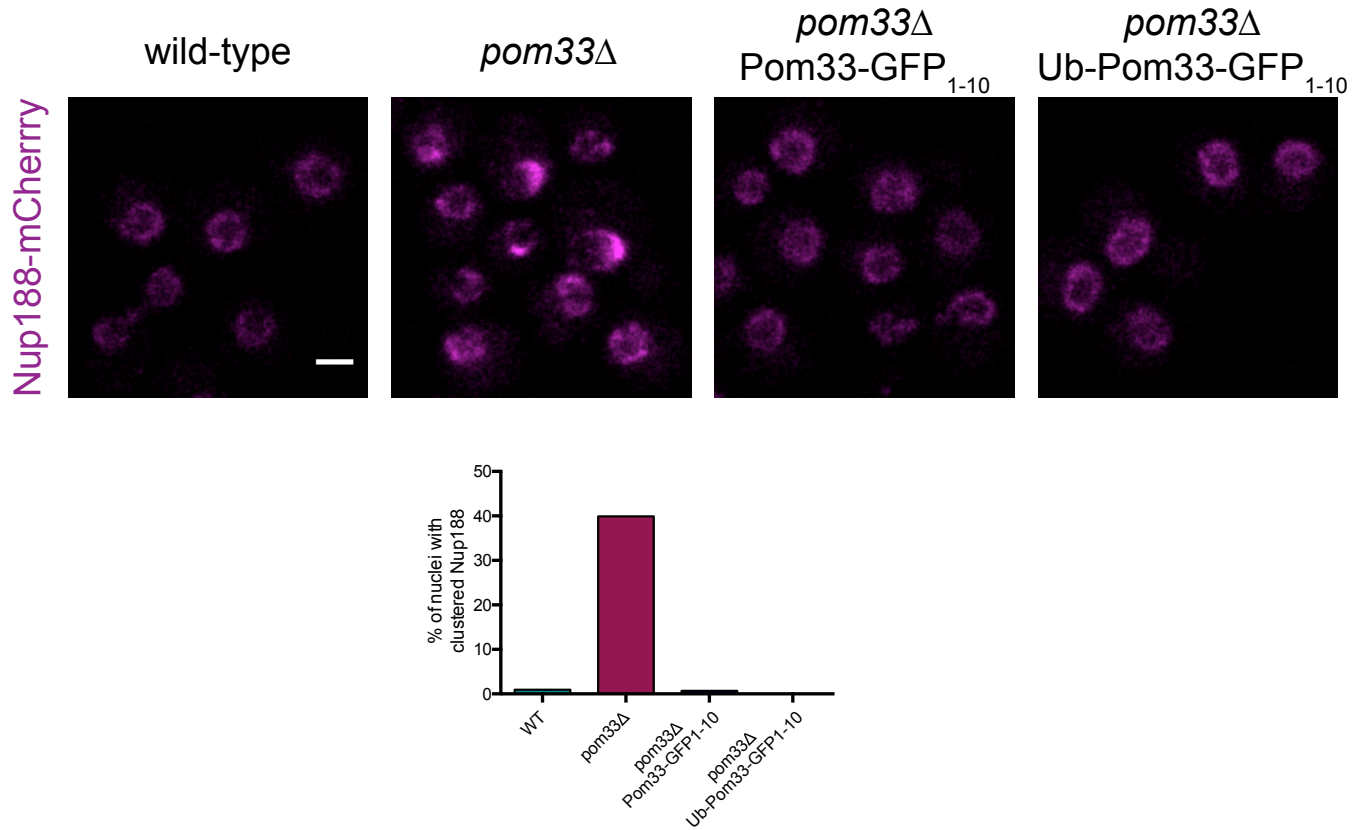

**Figure S4. Expression of Pom33-GFP<sub>1-10</sub> and Ub-Pom33-GFP<sub>1-10</sub> rescues NPC clustering in *pom33*Δ.** NPC distribution was assayed in wild-type and *pom33*Δ cells containing Nup188-mCherry. To test for rescue, Pom33-GFP<sub>1-10</sub> or Ub-Pom33-GFP<sub>1-10</sub> were added back to *pom33*Δ cells. Quantification of Nup188-mCherry clustering in each strain is plotted below. Bar, 2 μm.
