# Supplementary material
Source: publisher figshare collection journal article supplement (https://gsajournals.figshare.com/articles/dataset/_/7646975)
Supplement: Supplementary file 2 [file 1]

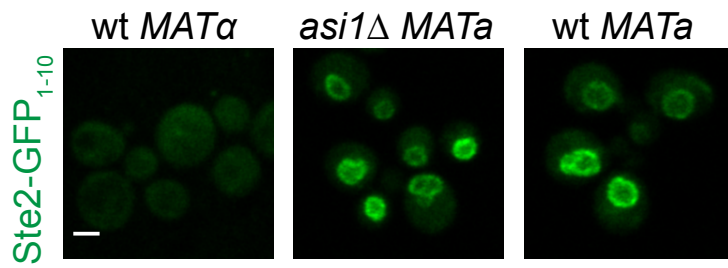

**Figure S1. Ste2 localization in Mata and Matα.**

Examination of Ste2-GFP<sub>1-10</sub> in wild-type and *asi1*Δ cells containing GFP<sub>11</sub>-mCherry-Pus1 shows that signal is mating-type specific. Bar, 2 μm.
