# Supplementary material
Source: publisher figshare collection journal article supplement (https://gsajournals.figshare.com/articles/dataset/_/7646975)
Supplement: Supplementary file 3 [file 1]

**A**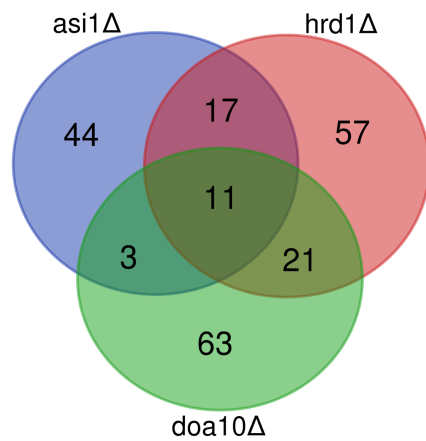**B**

| asi1Δ   | ubc7Δ   | doa10Δ | hrd1Δ |
|---------|---------|--------|-------|
| YBR287W | YBR287W | CTR1   | DER1* |
| YIP4    | YIP4    | AKR1   | PMT2  |
| VTC1    | AVT7    | TPO4   | VTC1  |
| ALG2    | ZRT2    | YOP1   | SIL1  |
| ZRT2    | VMA9    | RPN1   | ATG22 |
| VMA9    | IPT1    | STE13  | PHO84 |
| IPT1    | VTC1    | RTN2   | COX8  |
| IRC23   | IRC23   | IDH1   | SHE9  |
|         | VCX1    | KAR1   | KEX2  |
|         | ATG22   | VPS13  |       |
|         | PHO84   | SKG6   |       |
|         | NBP35   | UBA4   |       |
|         | SHE9    | ERG2   |       |
|         |         | HXT2   |       |
|         |         | SLP1   |       |
|         |         | USE1   |       |
|         |         | SHE9   |       |
|         |         | KEX2   |       |
|         |         | PHO84  |       |
|         |         | PEP8   |       |

**Figure S2. Overlap of potential targets within our screen and previously reported targets.**

A. Venn diagram showing overlap of hits for the E3 ligase mutants *asi1Δ*, *doa10Δ* and *hrd1Δ*.

B. Comparison of targets identified in our screen with those reported for the tandem fluorescent timer screen (KHMELINSKII et al. 2014) in green and proteomic analysis (FORESTI et al. 2014) in blue.

An asterisk denotes targets common in all three reports.
