# Supplementary material
Source: publisher figshare collection journal article supplement (https://gsajournals.figshare.com/articles/dataset/_/7646975)
Supplement: Supplementary file 4 [file 1]

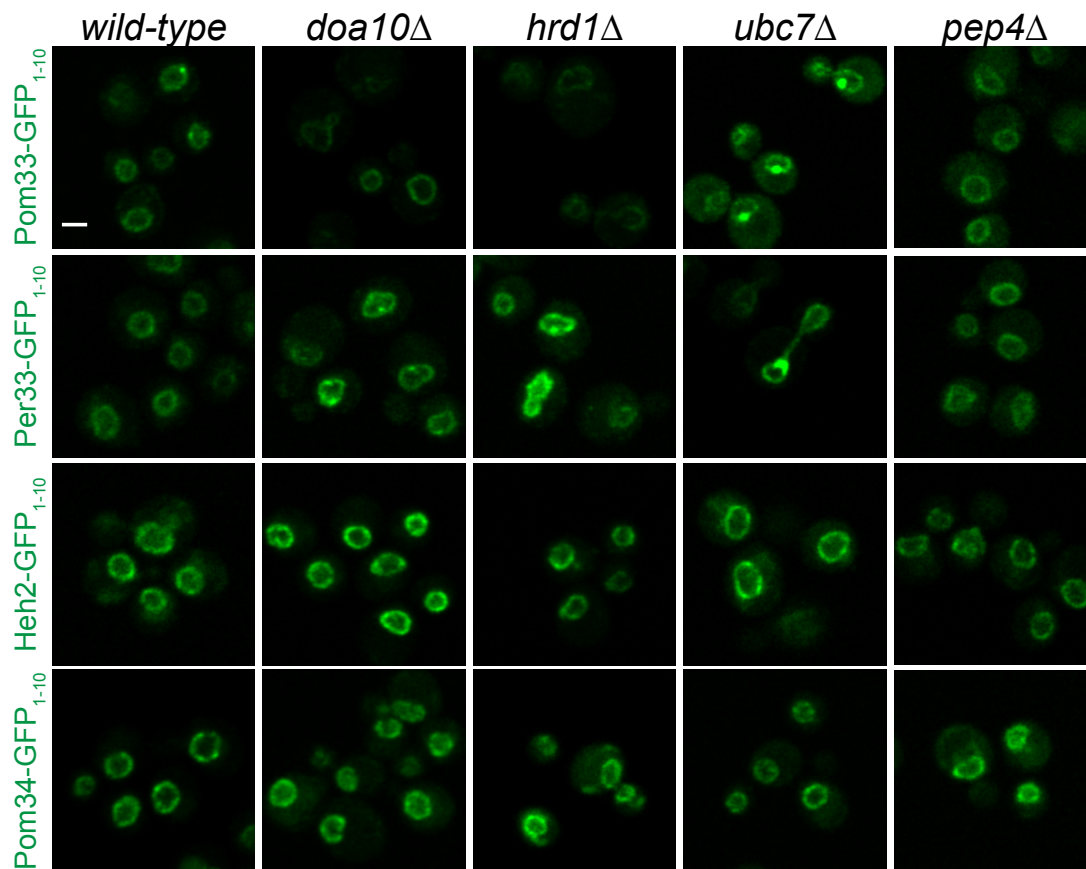

**Figure S3. Puncta are specific to Pom33 in mutants of the Asi Complex and E2 enzyme Ubc7.** Example images of Pom33-GFP<sub>1-10</sub>, Per33-GFP<sub>1-10</sub>, Heh2-GFP<sub>1-10</sub> and Pom34-GFP<sub>1-10</sub> signal in mutants disrupting the membrane E3 ligases Doa10 and Hrd1, a mutant of the E2 enzyme, Ubc7 and a mutant of the vacuolar protease, Pep4. All cells also expressed GFP<sub>11</sub>-mCherry-Pus1. Bar, 2  $\mu$ m.
