# Supplementary material
Source: publisher figshare collection journal article supplement (https://gsajournals.figshare.com/articles/dataset/_/7646975)
Supplement: Supplementary file 5 [file 1]

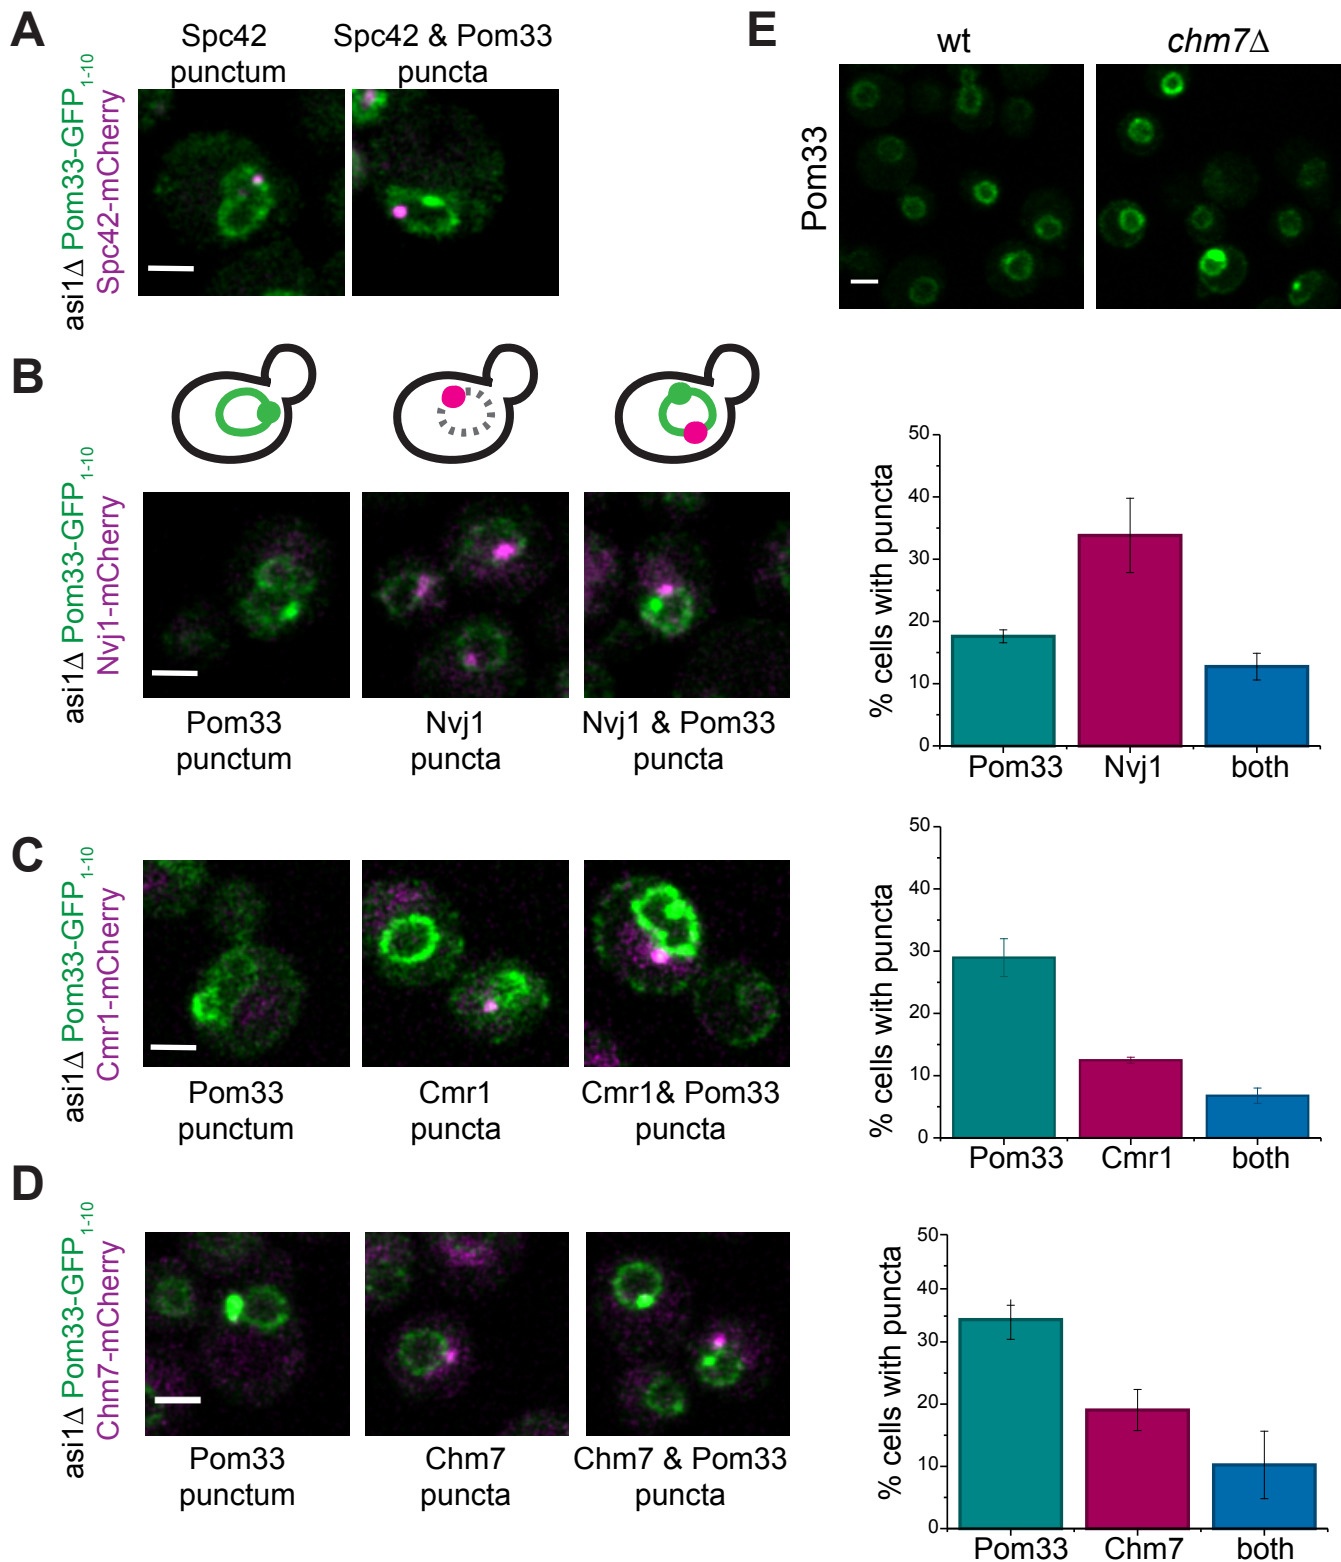

**Figure S5. Pom33 puncta tested with known nuclear foci representing the SPB, NVJ, INQ and SINC.**

A. Pom33-GFP<sub>1-10</sub> puncta did not colocalize with the SPB. B. Left, example images of Pom33-GFP<sub>1-10</sub> puncta, Nvj1-mCherry puncta (NVJ), and both in the same cell. Right, quantitation of puncta frequency,  $n = 198$  cells total. C. Left, example images of Pom33-GFP<sub>1-10</sub> puncta, Cmr1-mCherry puncta (INQ), and both in the same cell. Right, quantitation of puncta frequency,  $n = 80$  cells total. D. Left, example images of Pom33-GFP<sub>1-10</sub> puncta, Chm7-mCherry puncta (SINC), and both in the same cell. Right, quantitation of puncta frequency,  $n = 150$  cells total. E. Disruption of *CHM7* did not change Pom33 puncta formation. Bars, 2  $\mu$ m. Error bars equal SEM.
